# Supplementary material for: Risk of Corneal Transplant Rejection Following COVID-19 Vaccination: A Systematic Review and Meta-analysis
Source: PubMed Central journal article supplement — Ophthalmol Ther. 2024 Apr 16;13(6):1635–45. doi: 10.1007/s40123-024-00941-y (PMC11109062; doi:10.1007/s40123-024-00941-y), 2024-04-16
Supplement: 40123_2024_941_MOESM1_ESM.pdf [file 40123_2024_941_MOESM1_ESM.pdf]

## **Risk of corneal transplant rejection following COVID-19 vaccination: a systematic review and meta-analysis**

Parul Chawla Gupta<sup>1</sup>, Bijaya K Padhi<sup>2</sup>, Hashem Abu Serhan<sup>3\*</sup>, Arkadiusz Dziedzic<sup>4</sup>, Mahalaqua Nazli Khatib<sup>5</sup>, Shilpa Gaidhane<sup>6</sup>, Quazi Syed Zahiruddin<sup>7</sup>, Abhay M Gaidhane<sup>8</sup>, Neelima Kukreti<sup>9</sup>, Sarvesh Rustagi<sup>10</sup>, Prakasini Satapathy<sup>11,12</sup>

<sup>1</sup>Department of Ophthalmology, Postgraduate Institute of Medical Education and Research, Chandigarh 160012, India. Email: [pcgpgi@gmail.com](mailto:pcgpgi@gmail.com)

<sup>2</sup>Department of Community Medicine and School of Public Health, Postgraduate Institute of Medical Education and Research, Chandigarh-160012, India. Email: [bkpadhi@gmail.com](mailto:bkpadhi@gmail.com)

<sup>3</sup>Department of Ophthalmology, Hamad Medical Corporation, Doha, Qatar. Email: [habuserhan@hamad.qa](mailto:habuserhan@hamad.qa)

<sup>4</sup>Department of Conservative Dentistry with Endodontics, Medical University of Silesia, 40-055 Katowice, Poland. Email: [adziedzic@sum.edu.pl](mailto:adziedzic@sum.edu.pl)

<sup>5</sup>Division of Evidence Synthesis, Global Consortium of Public Health and Research, Datta Meghe Institute of Higher Education, Wardha, India. Email: [nazli.786@rediffmail.com](mailto:nazli.786@rediffmail.com)

<sup>6</sup>One Health Centre (COHERD), Jawaharlal Nehru Medical College, Datta Meghe Institute of Higher Education, Wardha, India. Email: [drshilpagaidhane@gmail.com](mailto:drshilpagaidhane@gmail.com)

<sup>7</sup>South Asia Infant Feeding Research Network (SAIFRN), Division of Evidence Synthesis, Global Consortium of Public Health and Research, Datta Meghe Institute of Higher Education, Wardha, India. Email: [zahirquazi@gmail.com](mailto:zahirquazi@gmail.com)

<sup>8</sup>Jawaharlal Nehru Medical College, and Global Health Academy, School of Epidemiology and Public Health. Datta Meghe Institute of Higher Education, Wardha, India. Email: [abhaygaidhane@gmail.com](mailto:abhaygaidhane@gmail.com)

<sup>9</sup>School of Pharmacy, Graphic Era Hill University, Dehradun, India. Email: [nkukreti@gehu.ac.in](mailto:nkukreti@gehu.ac.in)

<sup>10</sup>School of Applied and Life Sciences, Uttarakhand University, Dehradun, Uttarakhand, India. Email: [sarveshrustagi@uumail.in](mailto:sarveshrustagi@uumail.in)

<sup>11</sup>Center for Global Health Research, Saveetha Medical College and Hospital, Saveetha Institute of Medical and Technical Sciences, Saveetha University, Chennai, India. Email: [prakasini.satapathy@gmail.com](mailto:prakasini.satapathy@gmail.com)

<sup>12</sup>Medical Laboratories Techniques Department, AL-Mustaqbal University, 51001 Hillah, Babil, Iraq.

**\*Corresponding author**

**Hashem Abu Serhan**

**Email: [habuserhan@hamad.qa](mailto:habuserhan@hamad.qa)**

## **Supplementary Materials**

**Table S1.** PRISMA Checklist

**Table S2.** Inclusion and Exclusion criteria

**Table S3.** The adjusted search terms as per searched electronic databases

**Table S4.** Newcastle-Ottawa Scale for the quality assessment of studies

**Table S1. PRISMA Checklist**

| Section and Topic    | Item # | Checklist item (Prevalence of kidney diseases among the dengue patients: A systematic review and meta-analysis)                                                                                                                                                                  | Location where item is reported |
|----------------------|--------|----------------------------------------------------------------------------------------------------------------------------------------------------------------------------------------------------------------------------------------------------------------------------------|---------------------------------|
| <b>TITLE</b>         |        |                                                                                                                                                                                                                                                                                  |                                 |
| Title                | 1      | Identify the report as a systematic review.                                                                                                                                                                                                                                      | 1                               |
| <b>ABSTRACT</b>      |        |                                                                                                                                                                                                                                                                                  |                                 |
| Abstract             | 2      | See the PRISMA 2020 for Abstracts checklist. (made as per the Journal guidelines)                                                                                                                                                                                                | 2                               |
| <b>INTRODUCTION</b>  |        |                                                                                                                                                                                                                                                                                  |                                 |
| Rationale            | 3      | Describe the rationale for the review in the context of existing knowledge.                                                                                                                                                                                                      | 3                               |
| Objectives           | 4      | Provide an explicit statement of the objective(s) or question(s) the review addresses.                                                                                                                                                                                           | 3                               |
| <b>METHODS</b>       |        |                                                                                                                                                                                                                                                                                  |                                 |
| Eligibility criteria | 5      | Specify the inclusion and exclusion criteria for the review and how studies were grouped for the syntheses.                                                                                                                                                                      | 4                               |
| Information sources  | 6      | Specify all databases, registers, websites, organisations, reference lists and other sources searched or consulted to identify studies. Specify the date when each source was last searched or consulted.                                                                        | 4, Table S3                     |
| Search strategy      | 7      | Present the full search strategies for all databases, registers and websites, including any filters and limits used.                                                                                                                                                             | Table S3                        |
| Selection process    | 8      | Specify the methods used to decide whether a study met the inclusion criteria of the review, including how many reviewers screened each record and each report retrieved, whether they worked independently, and if applicable, details of automation tools used in the process. | 4                               |
| Data collection      | 9      | Specify the methods used to collect data from reports, including how many reviewers collected data from each report, whether they worked independently, any processes for obtaining or confirming data                                                                           | 4                               |

| Section and Topic             | Item # | Checklist item (Prevalence of kidney diseases among the dengue patients: A systematic review and meta-analysis)                                                                                                                                                                | Location where item is reported |
|-------------------------------|--------|--------------------------------------------------------------------------------------------------------------------------------------------------------------------------------------------------------------------------------------------------------------------------------|---------------------------------|
| process                       |        | from study investigators, and if applicable, details of automation tools used in the process.                                                                                                                                                                                  |                                 |
| Data items                    | 10a    | List and define all outcomes for which data were sought. Specify whether all results that were compatible with each outcome domain in each study were sought (e.g., for all measures, time points, analyses), and if not, the methods used to decide which results to collect. | 3                               |
|                               | 10b    | List and define all other variables for which data were sought (e.g., participant and intervention characteristics, funding sources). Describe any assumptions made about any missing or unclear information.                                                                  | 4, Table S4                     |
| Study risk of bias assessment | 11     | Specify the methods used to assess risk of bias in the included studies, including details of the tool(s) used, how many reviewers assessed each study and whether they worked independently, and if applicable, details of automation tools used in the process.              | Table S4                        |
| Effect measures               | 12     | Specify for each outcome the effect measure(s) (e.g. risk ratio, mean difference) used in the synthesis or presentation of results.                                                                                                                                            | 5                               |
| Synthesis methods             | 13a    | Describe the processes used to decide which studies were eligible for each synthesis (e.g. tabulating the study intervention characteristics and comparing against the planned groups for each synthesis (item #5)).                                                           | 4,5                             |
|                               | 13b    | Describe any methods required to prepare the data for presentation or synthesis, such as handling of missing summary statistics, or data conversions.                                                                                                                          | NA                              |
|                               | 13c    | Describe any methods used to tabulate or visually display results of individual studies and syntheses.                                                                                                                                                                         |                                 |
|                               | 13d    | Describe any methods used to synthesize results and provide a rationale for the choice(s). If meta-analysis was performed, describe the model(s), method(s) to identify the presence and extent of statistical heterogeneity, and software package(s) used.                    | 4.5                             |
|                               | 13e    | Describe any methods used to explore possible causes of heterogeneity among study results (e.g. subgroup analysis, meta-regression).                                                                                                                                           | 5                               |
|                               | 13f    | Describe any sensitivity analyses conducted to assess robustness of the synthesized results.                                                                                                                                                                                   | 6                               |
| Reporting bias                | 14     | Describe any methods used to assess risk of bias due to missing results in a synthesis (arising from                                                                                                                                                                           | 5                               |

| Section and Topic             | Item # | Checklist item (Prevalence of kidney diseases among the dengue patients: A systematic review and meta-analysis)                                                                                                                                                                      | Location where item is reported |
|-------------------------------|--------|--------------------------------------------------------------------------------------------------------------------------------------------------------------------------------------------------------------------------------------------------------------------------------------|---------------------------------|
| assessment                    |        | reporting biases).                                                                                                                                                                                                                                                                   |                                 |
| Certainty assessment          | 15     | Describe any methods used to assess certainty (or confidence) in the body of evidence for an outcome.                                                                                                                                                                                | NA                              |
| <b>RESULTS</b>                |        |                                                                                                                                                                                                                                                                                      |                                 |
| Study selection               | 16a    | Describe the results of the search and selection process, from the number of records identified in the search to the number of studies included in the review, ideally using a flow diagram.                                                                                         | Table S2                        |
|                               | 16b    | Cite studies that might appear to meet the inclusion criteria, but which were excluded, and explain why they were excluded.                                                                                                                                                          | NA                              |
| Study characteristics         | 17     | Cite each included study and present its characteristics.                                                                                                                                                                                                                            | 4,5<br>Table 1                  |
| Risk of bias in studies       | 18     | Present assessments of risk of bias for each included study.                                                                                                                                                                                                                         | Table S4                        |
| Results of individual studies | 19     | For all outcomes, present, for each study: (a) summary statistics for each group (where appropriate) and (b) an effect estimate and its precision (e.g. confidence/credible interval), ideally using structured tables or plots.                                                     | Table 1,<br>Figure 2            |
| Results of syntheses          | 20a    | For each synthesis, briefly summarise the characteristics and risk of bias among contributing studies.                                                                                                                                                                               | 4                               |
|                               | 20b    | Present results of all statistical syntheses conducted. If meta-analysis was done, present for each the summary estimate and its precision (e.g. confidence/credible interval) and measures of statistical heterogeneity. If comparing groups, describe the direction of the effect. | 5,4<br>Figure 2                 |
|                               | 20c    | Present results of all investigations of possible causes of heterogeneity among study results.                                                                                                                                                                                       | 5                               |
|                               | 20d    | Present results of all sensitivity analyses conducted to assess the robustness of the synthesized results.                                                                                                                                                                           | Figure S2                       |
| Reporting biases              | 21     | Present assessments of risk of bias due to missing results (arising from reporting biases) for each synthesis assessed.                                                                                                                                                              | Table S4                        |
| Certainty of evidence         | 22     | Present assessments of certainty (or confidence) in the body of evidence for each outcome assessed.                                                                                                                                                                                  | NA                              |

| Section and Topic                              | Item # | Checklist item (Prevalence of kidney diseases among the dengue patients: A systematic review and meta-analysis)                                                                                                                            | Location where item is reported |
|------------------------------------------------|--------|--------------------------------------------------------------------------------------------------------------------------------------------------------------------------------------------------------------------------------------------|---------------------------------|
| <b>DISCUSSION</b>                              |        |                                                                                                                                                                                                                                            |                                 |
| Discussion                                     | 23a    | Provide a general interpretation of the results in the context of other evidence.                                                                                                                                                          | 5,6, 7                          |
|                                                | 23b    | Discuss any limitations of the evidence included in the review.                                                                                                                                                                            | 7                               |
|                                                | 23c    | Discuss any limitations of the review processes used.                                                                                                                                                                                      | 7                               |
|                                                | 23d    | Discuss implications of the results for practice, policy, and future research.                                                                                                                                                             | 7                               |
| <b>OTHER INFORMATION</b>                       |        |                                                                                                                                                                                                                                            |                                 |
| Registration and protocol                      | 24a    | Provide registration information for the review, including register name and registration number, or state that the review was not registered.                                                                                             | 3                               |
|                                                | 24b    | Indicate where the review protocol can be accessed, or state that a protocol was not prepared.                                                                                                                                             | 3                               |
|                                                | 24c    | Describe and explain any amendments to information provided at registration or in the protocol.                                                                                                                                            | NA                              |
| Support                                        | 25     | Describe sources of financial or non-financial support for the review, and the role of the funders or sponsors in the review.                                                                                                              | 8                               |
| Competing interests                            | 26     | Declare any competing interests of review authors.                                                                                                                                                                                         | 7                               |
| Availability of data, code and other materials | 27     | Report which of the following are publicly available and where they can be found: template data collection forms; data extracted from included studies; data used for all analyses; analytic code; any other materials used in the review. | Supplementary Materials         |

**Table S2.** Inclusion and Exclusion criteria

**Research Question:** Does the COVID-19 vaccine increase the risk of corneal transplant rejection??

| <b>Inclusion</b>     |                                                                                                                      | <b>Exclusion</b>                                                                      |
|----------------------|----------------------------------------------------------------------------------------------------------------------|---------------------------------------------------------------------------------------|
| <b>Participants</b>  | Participants: Individuals underwent corneal transplant                                                               | Participants with other surgeries                                                     |
| <b>Exposure</b>      | COVID-19 vaccine of any type                                                                                         | Other vaccines                                                                        |
| <b>Outcome</b>       | Corneal transplant rejection                                                                                         |                                                                                       |
| <b>Study Designs</b> | RCTs, observational studies, longitudinal studies, retrospective studies, prospective studies, case-control studies, | Qualitative, policy, opinion, case studies, case reports, reviews, and animal studies |
|                      | Geography-Global level<br>Date of Search- Publish till 12 <sup>th</sup> Feb 2024                                     | None                                                                                  |
|                      | Published articles                                                                                                   |                                                                                       |



**Table S3. The adjusted search terms as per searched electronic databases [as of 12.02.2024]**

| Database        | No | Search Query                                                                                                                                                                                                                                                                                                                                                                                                                                                                                                                                                                                                                                                                                                                                                                                                                                                                                                                                                                                                                                                                                                                                                                                                                                                                                                                                                                                                                                                                                                                                                                                                                                                                                                                     | Results |
|-----------------|----|----------------------------------------------------------------------------------------------------------------------------------------------------------------------------------------------------------------------------------------------------------------------------------------------------------------------------------------------------------------------------------------------------------------------------------------------------------------------------------------------------------------------------------------------------------------------------------------------------------------------------------------------------------------------------------------------------------------------------------------------------------------------------------------------------------------------------------------------------------------------------------------------------------------------------------------------------------------------------------------------------------------------------------------------------------------------------------------------------------------------------------------------------------------------------------------------------------------------------------------------------------------------------------------------------------------------------------------------------------------------------------------------------------------------------------------------------------------------------------------------------------------------------------------------------------------------------------------------------------------------------------------------------------------------------------------------------------------------------------|---------|
| Date:12-02-2024 |    |                                                                                                                                                                                                                                                                                                                                                                                                                                                                                                                                                                                                                                                                                                                                                                                                                                                                                                                                                                                                                                                                                                                                                                                                                                                                                                                                                                                                                                                                                                                                                                                                                                                                                                                                  |         |
| PubMed          | #1 | "COVID-19"[MeSH Terms] OR "severe acute respiratory syndrome related coronavirus"[MeSH Terms] OR "COVID-19"[All Fields] OR "Coronavirus"[All Fields] OR "SARS-COV-2"[All Fields] OR "covid*"[All Fields]                                                                                                                                                                                                                                                                                                                                                                                                                                                                                                                                                                                                                                                                                                                                                                                                                                                                                                                                                                                                                                                                                                                                                                                                                                                                                                                                                                                                                                                                                                                         | 429581  |
|                 | #2 | "vaccin"[Supplementary Concept] OR "vaccin"[All Fields] OR "vaccination"[MeSH Terms] OR "vaccination"[All Fields] OR "vaccinable"[All Fields] OR "vaccinal"[All Fields] OR "vaccinate"[All Fields] OR "vaccinated"[All Fields] OR "vaccinates"[All Fields] OR "vaccinating"[All Fields] OR "vaccinations"[All Fields] OR "vaccination s"[All Fields] OR "vaccinator"[All Fields] OR "vaccinators"[All Fields] OR "vaccine s"[All Fields] OR "vaccined"[All Fields] OR "vaccines"[MeSH Terms] OR "vaccines"[All Fields] OR "vaccine"[All Fields] OR "vaccins"[All Fields] OR "vaccin"[Supplementary Concept] OR "vaccin"[All Fields] OR "vaccination"[MeSH Terms] OR "vaccination"[All Fields] OR "vaccinable"[All Fields] OR "vaccinal"[All Fields] OR "vaccinate"[All Fields] OR "vaccinated"[All Fields] OR "vaccinates"[All Fields] OR "vaccinating"[All Fields] OR "vaccinations"[All Fields] OR "vaccination s"[All Fields] OR "vaccinator"[All Fields] OR "vaccinators"[All Fields] OR "vaccine s"[All Fields] OR "vaccined"[All Fields] OR "vaccines"[MeSH Terms] OR "vaccines"[All Fields] OR "vaccine"[All Fields] OR "vaccins"[All Fields] OR "vaccin"[Supplementary Concept] OR "vaccin"[All Fields] OR "vaccination"[MeSH Terms] OR "vaccination"[All Fields] OR "vaccinable"[All Fields] OR "vaccinal"[All Fields] OR "vaccinate"[All Fields] OR "vaccinated"[All Fields] OR "vaccinates"[All Fields] OR "vaccinating"[All Fields] OR "vaccinations"[All Fields] OR "vaccination s"[All Fields] OR "vaccinator"[All Fields] OR "vaccinators"[All Fields] OR "vaccine s"[All Fields] OR "vaccined"[All Fields] OR "vaccines"[MeSH Terms] OR "vaccines"[All Fields] OR "vaccine"[All Fields] OR "vaccins"[All Fields] | 521130  |
|                 | #3 | "corneal transplant*"[All Fields] OR "graft rejection"[All Fields] OR "corneal rejection"[All Fields] OR ("corneal transplantation"[MeSH Terms] OR ("corneal"[All Fields] AND "transplantation"[All Fields]) OR "corneal transplantation"[All Fields] OR ("corneal"[All Fields] AND "graft"[All Fields]) OR "corneal graft"[All Fields]) OR ("corneal"[All Fields] AND "rejection"[All Fields]) OR (("cornea"[MeSH Terms]                                                                                                                                                                                                                                                                                                                                                                                                                                                                                                                                                                                                                                                                                                                                                                                                                                                                                                                                                                                                                                                                                                                                                                                                                                                                                                        | 95963   |



|    |                                                                                                                                                                                                                                                                                                                                                                                                                                                                                                                                                                                                |       |
|----|------------------------------------------------------------------------------------------------------------------------------------------------------------------------------------------------------------------------------------------------------------------------------------------------------------------------------------------------------------------------------------------------------------------------------------------------------------------------------------------------------------------------------------------------------------------------------------------------|-------|
| #3 | (((((((((((((((TI=(CORNEAL TRANSPLANT)) OR TI=(GRAFT REJECTION)) OR TI=(corneal rejection)) OR TI=(corneal transplantation)) OR TI=(corneal and transplantation)) OR TI=(corneal graft)) AND TI=(Rejection or failure or failures)) OR TI=(keratoprosthesis)) OR TI=(keratoplasties or keratoplasty) OR AB =(CORNEAL TRANSPLANT)) OR AB=(GRAFT REJECTION)) OR AB=(corneal rejection)) OR AB=(corneal transplantation)) OR AB=(corneal and transplantation)) OR AB=(corneal graft)) AND AB=(Rejection or failure or failures)) OR AB=(keratoprosthesis)) OR AB=(keratoplasties or keratoplasty) | 37727 |
| #4 | #1 AND #2AND #3                                                                                                                                                                                                                                                                                                                                                                                                                                                                                                                                                                                | 55    |

**Table S4.** Newcastle-Ottawa Scale for the quality assessment of studies

| STUDY         | SELECTION (max 4 points) |           |               |                                                                            | COMPARABILITY (max 2 points)                      | OUTCOME (max 3 points) |                                                  |                           | SCORE (out of 9) |
|---------------|--------------------------|-----------|---------------|----------------------------------------------------------------------------|---------------------------------------------------|------------------------|--------------------------------------------------|---------------------------|------------------|
|               | Representativeness       | Selection | Ascertainment | Demonstration of the outcome of interest was not present at start of study | Comparability the basis of the design or analysis | Assessment of outcome  | Was follow-up long enough for outcomes to occur? | Adequacy of the follow-up |                  |
| Igarashi 2023 | 1                        | 1         | 1             | 1                                                                          | 2                                                 | 1                      | 1                                                | 0                         | 7                |
| Busin 2022    | 1                        | 1         | 1             | 1                                                                          | 2                                                 | 1                      | 1                                                | 1                         | 9                |
| Roberts 2023  | 1                        | 1         | 1             | 1                                                                          | 2                                                 | 1                      | 1                                                | 1                         | 9                |
| Fujimoto 2021 | 1                        | 1         | 1             | 1                                                                          | 2                                                 | 1                      | 1                                                | 1                         | 9                |
| Culp 2022     | 1                        | 1         | 1             | 1                                                                          | 2                                                 | 1                      | ?                                                | ?                         | ?                |
| Igarashi 2023 | 1                        | 1         | 1             | 1                                                                          | 2                                                 | 1                      | 1                                                | 1                         | 9                |
